# Supplementary material
Source: PubMed Central journal article supplement (PMC4183603)
Supplement: ja508015a_si_001.pdf [file ja508015a_si_001.pdf]

Supporting Information

Crystal Structure Studies of RNA Duplexes Containing  $s^2U:A$  and  
 $s^2U:U$  Base Pairs

Jia Sheng, Aaron Larsen, Benjamin D. Heuberger, J. Craig Blain, and Jack W. Szostak\*

Howard Hughes Medical Institute, Center for Computational and Integrative Biology, and Department of Molecular  
Biology, Simches Research Center, Massachusetts General Hospital, Boston, MA 02114

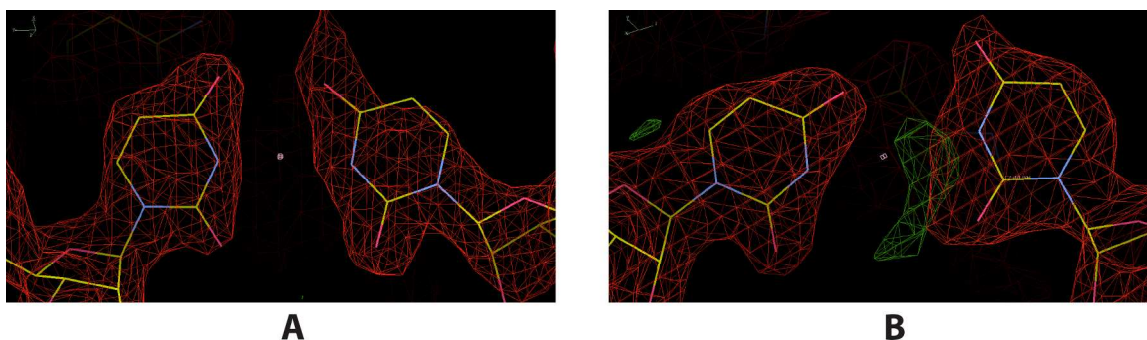

**Figure S1.** Experimental density map of (A) U5:U10 pair in chain EF (corresponding to Fig. 4D); and (B) U5:U10 pair in chain GH (corresponding to Fig. 4E). The red color represents the 2Fo-Fc map with  $\sigma$  level 1.3; the green color represents the Fo-Fc map with  $\sigma$  level 3.0.

**Table S1.** Local base-pair structural parameters in the  $s^2$ U-U 7mer ( $s^2$ UU): [5'-uagc( $s^2$ U)cc-3'/3'-aucgUgg-5'] and the native-UU 7mer: [5'-uagucc-3'/3'-aucgugg-5'], including all four duplexes in the asymmetric unit (N-UU-1, N-UU-2, N-UU-3 and N-UU-4).

|               |          | Local Base-Pairs |        |        |        |               |        |       |        |
|---------------|----------|------------------|--------|--------|--------|---------------|--------|-------|--------|
|               |          | U-A              | A-U    | G-C    | C-G    | U-U           | C-G    | C-G   | Ave.   |
| Shear (Å)     | N-UU-1   | -0.34            | 0.16   | -0.3   | 0.77   | -2.45         | 0.33   | 0.33  | -0.21  |
|               | N-UU-2   | 0.02             | -0.02  | -0.39  | 0.39   | 2.08          | 0.18   | 0.52  | 0.40   |
|               | N-UU-3   | -0.3             | -0.1   | -0.25  | 0.34   | 0.68          | 0.12   | 0.17  | 0.09   |
|               | N-UU-4   | -1.02            | -0.03  | -0.36  | 0.03   | -1.87         | 0.06   | 0.66  | -0.36  |
|               | $s^2$ UU | -0.33            | 0.06   | -0.43  | 0.24   | <b>2.26</b>   | 0.27   | 0.38  | 0.35   |
| Stretch (Å)   | N-UU-1   | -0.07            | -0.02  | -0.17  | -0.05  | -1.66         | -0.22  | -0.19 | -0.34  |
|               | N-UU-2   | -0.22            | -0.14  | -0.13  | -0.23  | -1.8          | -0.23  | -0.2  | -0.42  |
|               | N-UU-3   | -0.24            | -0.36  | -0.31  | -0.13  | -1.36         | -0.2   | -0.18 | -0.40  |
|               | N-UU-4   | -0.14            | -0.26  | -0.19  | -0.25  | -0.74         | -0.3   | -0.36 | -0.32  |
|               | $s^2$ UU | -0.05            | -0.14  | -0.23  | -0.17  | <b>-1.56</b>  | -0.16  | -0.17 | -0.35  |
| Stagger (Å)   | N-UU-1   | -0.33            | -0.11  | -0.13  | -0.23  | 0.18          | -0.46  | -0.27 | -0.19  |
|               | N-UU-2   | -0.24            | -0.18  | 0.08   | -0.27  | 0.42          | -0.11  | 0.11  | -0.03  |
|               | N-UU-3   | 0.07             | 0      | -0.17  | -0.22  | 0.21          | 0.1    | -0.31 | -0.05  |
|               | N-UU-4   | -0.29            | 0.04   | -0.06  | 0.04   | -0.39         | -0.17  | -0.1  | -0.13  |
|               | $s^2$ UU | 0.07             | 0.26   | -0.02  | -0.12  | <b>0.12</b>   | -0.12  | -0.01 | 0.03   |
| Buckle (°)    | N-UU-1   | 6.68             | 0.92   | -1     | 4.15   | 11.53         | 13.57  | 2.86  | 5.53   |
|               | N-UU-2   | 1.39             | 1.7    | 2.22   | 14.86  | 0.57          | 8.12   | 0.49  | 4.19   |
|               | N-UU-3   | 2.74             | 1.16   | -0.6   | 3.32   | 1.81          | 2.81   | 8.14  | 2.77   |
|               | N-UU-4   | 5.57             | -0.38  | 0.91   | 6.38   | 4.7           | 2.2    | 5.21  | 3.51   |
|               | $s^2$ UU | -3.60            | 6.66   | 4.95   | 6.43   | <b>-6.89</b>  | 5.63   | -0.17 | 1.86   |
| Propeller (°) | N-UU-1   | -15.02           | -8.25  | -12.97 | -18.54 | -9.36         | -18.07 | -1.28 | -11.93 |
|               | N-UU-2   | -10.01           | -8.84  | -11    | -21.05 | -20.79        | -16.77 | -6.4  | -13.55 |
|               | N-UU-3   | -6.81            | -13.36 | -11.66 | -12.73 | -13.28        | -11.63 | -5.75 | -10.75 |
|               | N-UU-4   | -1.99            | -10.48 | -14.96 | -13.86 | -16.02        | -15.69 | -3.66 | -10.95 |
|               | $s^2$ UU | -2.51            | -13.02 | -11.90 | -11.72 | <b>-15.51</b> | -18.80 | -1.41 | -10.70 |
| Opening (°)   | N-UU-1   | 3.71             | 3.11   | -1.54  | -0.83  | 7.1           | 2.37   | 0.97  | 2.13   |
|               | N-UU-2   | -0.43            | -0.17  | 1.51   | 2.91   | 9.19          | 2.71   | 3.14  | 2.69   |
|               | N-UU-3   | 1.98             | 2.8    | 1.76   | 3.02   | -4.62         | 3.7    | -0.38 | 1.18   |
|               | N-UU-4   | -4.66            | -2.3   | 2.78   | 3.7    | -11.61        | 2.22   | 2.64  | -1.03  |
|               | $s^2$ UU | 0.60             | 4.92   | 2.28   | -2.44  | <b>-4.86</b>  | 1.58   | -1.30 | 0.11   |

**Table S2.** Structural parameters of base pair steps in s<sup>2</sup>U-U 7mer (s<sup>2</sup>UU): [5'-uagc(s<sup>2</sup>U)cc-3'/3'-aucgUgg-5'] and Native-UU 7mer: [5'-uagucc-3'/3'-aucgugg-5'] including all the four duplexes in one asymmetric unit (N-UU-1, N-UU-2, N-UU-3 and N-UU-4).

|                 |                   | Base-Pair Steps |       |       |              |              |       |       |
|-----------------|-------------------|-----------------|-------|-------|--------------|--------------|-------|-------|
|                 |                   | UA/UA           | AG/CU | GC/GC | CU/UG        | UC/GU        | CC/GG | Ave.  |
| X-disp (Å)      | N-UU-1            | -2.78           | -4.3  | -3.42 | -6.86        | -1.85        | -4.44 | -3.94 |
|                 | N-UU-2            | -3.67           | -6.59 | -3.35 | -2.78        | -4.4         | -4    | -4.13 |
|                 | N-UU-3            | -3.49           | -3.36 | -3.98 | <b>-3.88</b> | <b>-4.23</b> | -4.17 | -3.85 |
|                 | N-UU-4            | -3.74           | -4.9  | -3.56 | <b>-7.24</b> | <b>-2.67</b> | -3.08 | -4.20 |
|                 | s <sup>2</sup> UU | -4.20           | -4.45 | -3.39 | <b>-3.13</b> | <b>-4.24</b> | -4.38 | -3.97 |
| Inclination (°) | N-UU-1            | 13.16           | 11.47 | 8.35  | 47.25        | 9.49         | 16.55 | 17.71 |
|                 | N-UU-2            | 18.49           | 12.23 | 7.65  | 16.74        | 14.44        | 9.5   | 13.18 |
|                 | N-UU-3            | 13.59           | 13.76 | 10.3  | 20.78        | 9.74         | 8.71  | 12.81 |
|                 | N-UU-4            | 12.18           | 13.6  | 15.11 | 31.96        | 7.11         | 10.68 | 15.11 |
|                 | s <sup>2</sup> UU | 19.27           | 17.69 | 12.79 | <b>15.25</b> | <b>6.61</b>  | 14.24 | 14.31 |
| Shift (Å)       | N-UU-1            | 0.22            | -0.55 | -0.1  | -0.36        | -0.3         | 0.1   | -0.17 |
|                 | N-UU-2            | 0.1             | 0.42  | -0.96 | 0.19         | -0.17        | 0.18  | -0.04 |
|                 | N-UU-3            | -0.01           | -0.54 | 0.56  | -0.38        | 0.27         | 0.39  | 0.05  |
|                 | N-UU-4            | 0.35            | -0.77 | 0.26  | -0.55        | 0.47         | 0.18  | -0.01 |
|                 | s <sup>2</sup> UU | -0.01           | -0.79 | -0.37 | <b>0.3</b>   | <b>0.68</b>  | -0.67 | -0.14 |
| Slide (Å)       | N-UU-1            | -0.99           | -1.72 | -1.55 | -1.69        | -0.94        | -1.66 | -1.43 |
|                 | N-UU-2            | -1.08           | -2.42 | -1.57 | -1.1         | -1.29        | -1.85 | -1.55 |
|                 | N-UU-3            | -1.33           | -1.3  | -1.6  | -1.4         | -1.71        | -1.82 | -1.53 |
|                 | N-UU-4            | -1.63           | -1.86 | -1.45 | -1.93        | -1.52        | -1.36 | -1.63 |
|                 | s <sup>2</sup> UU | -1.43           | -1.61 | -1.35 | <b>-1.53</b> | <b>-1.66</b> | -1.62 | -1.53 |
| Rise (Å)        | N-UU-1            | 3.5             | 3.26  | 3.23  | 2.8          | 3.37         | 3.58  | 3.29  |
|                 | N-UU-2            | 3.35            | 3.18  | 2.93  | 3.58         | 2.91         | 3.41  | 3.23  |
|                 | N-UU-3            | 3.26            | 3.23  | 3.16  | 3.18         | 3.12         | 3.1   | 3.18  |
|                 | N-UU-4            | 3.5             | 3.23  | 3.05  | 3.17         | 3.46         | 3.17  | 3.26  |
|                 | s <sup>2</sup> UU | 2.94            | 3.17  | 3.25  | <b>3.67</b>  | <b>2.71</b>  | 3.46  | 3.20  |
| Tilt (°)        | N-UU-1            | -2.59           | -0.57 | 0.65  | -10.24       | 4.81         | -1.43 | -1.56 |
|                 | N-UU-2            | 0.2             | -3.21 | -1.78 | -2.64        | 9.32         | -0.12 | 0.30  |
|                 | N-UU-3            | 0.41            | -0.33 | 1.67  | -3.31        | 2.65         | 5.91  | 1.17  |
|                 | N-UU-4            | -2.97           | -1.94 | -0.26 | 0.03         | -2.01        | -0.46 | -1.27 |
|                 | s <sup>2</sup> UU | -1.89           | -2.56 | -0.55 | <b>2.40</b>  | <b>7.73</b>  | -2.29 | 0.47  |
| Roll (°)        | N-UU-1            | 8.1             | 6.12  | 4.83  | 19.04        | 7.34         | 9.47  | 9.15  |
|                 | N-UU-2            | 10.21           | 5.54  | 4.41  | 12.05        | 6.16         | 5.59  | 7.33  |
|                 | N-UU-3            | 7.85            | 8.13  | 5.47  | 12.57        | 5.04         | 4.68  | 7.29  |
|                 | N-UU-4            | 7.42            | 7.02  | 9.08  | 13.83        | 5.07         | 6.54  | 8.16  |
|                 | s <sup>2</sup> UU | 10.34           | 9.68  | 7.53  | <b>11.50</b> | <b>3.00</b>  | 7.74  | 8.30  |
| Twist (°)       | N-UU-1            | 35.2            | 30.53 | 33.38 | 16.15        | 45.02        | 32.35 | 32.11 |
|                 | N-UU-2            | 30.98           | 25.68 | 33.24 | 41.04        | 22.95        | 33.92 | 31.30 |
|                 | N-UU-3            | 32.99           | 33.72 | 30.45 | 33.65        | 29.64        | 30.56 | 31.84 |
|                 | N-UU-4            | 34.9            | 29.32 | 34.2  | 22.42        | 41.53        | 35.28 | 32.94 |
|                 | s <sup>2</sup> UU | 29.95           | 30.72 | 33.68 | <b>43.28</b> | <b>25.42</b> | 30.86 | 32.32 |

**Table S3:** Overlap area summary of base pair steps in s<sup>2</sup>U-U 7mer (s<sup>2</sup>UU): [5'-uagc(s<sup>2</sup>U)cc-3'/3'-aucgUgg-5'] and Native-UU 7mer: [5'-uagcucc-3'/3'-aucgugg-5'] including all the four duplexes in one asymmetric unit (N-UU-1, N-UU-2, N-UU-3 and N-UU-4).

|   | Steps   | Total Overlap Area* |        |        |        |        |
|---|---------|---------------------|--------|--------|--------|--------|
|   |         | s <sup>2</sup> UU   | N-UU-1 | N-UU-2 | N-UU-3 | N-UU-4 |
| 1 | UA/UA   | 2.19                | 1.85   | 2.27   | 2.41   | 1.98   |
| 2 | AG/CU   | 1.55                | 1.50   | 3.10   | 2.48   | 1.26   |
| 3 | GC/GC   | 13.04               | 13.74  | 11.57  | 12.71  | 12.05  |
| 4 | CU/AG   | 2.04                | 2.26   | 3.12   | 1.88   | 0.73   |
| 5 | UC/GU   | 4.85                | 10.53  | 6.32   | 5.55   | 7.69   |
| 6 | CC/GG   | 4.62                | 3.89   | 3.86   | 3.40   | 5.01   |
|   | Overall | 28.29               | 33.77  | 30.24  | 28.43  | 28.72  |

\*The total overlap area (in Å<sup>2</sup>) includes both intra-strand and inter-strand overlap within the four bases of each base pair step.

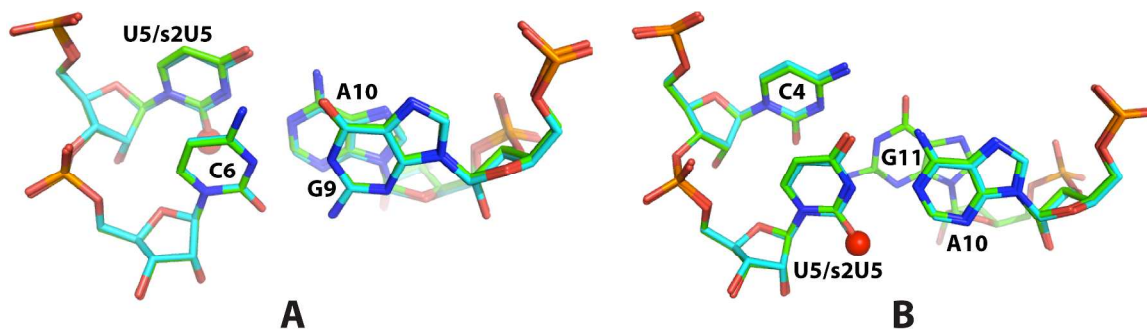

**Figure S2.** Comparison of base-pair steps in the native and s<sup>2</sup>U:A-containing duplex. (A) Superimposed views of the U5-C6/G9-A10 and s<sup>2</sup>U5-C6/G9-A10 steps; (B) Superimposed views of the C4-U5/A10-G11 and C4-s<sup>2</sup>U5/A10-G11 steps.

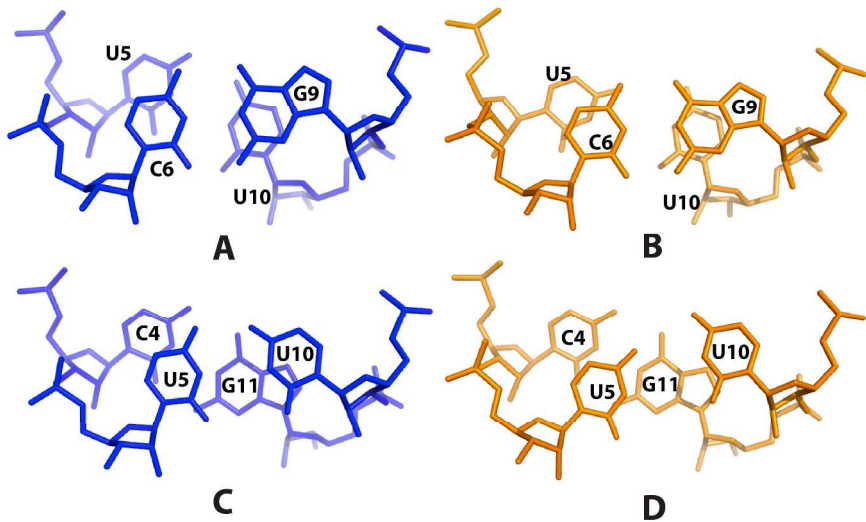

**Figure S3.** Stacking interactions of the two base-pair steps in the native UU-3 and UU-4 duplexes. (A) U5-C6/G9-A10 step in the native duplex UU-3. (B) U5-C6/G9-A10 step in the native duplex UU-4. (C) C4-U5/A10-G11 step in the native duplex UU-3. (D) C4-U5/A10-G11 step in the native duplex UU-4. The color code is same as in Fig. 3 and 4.

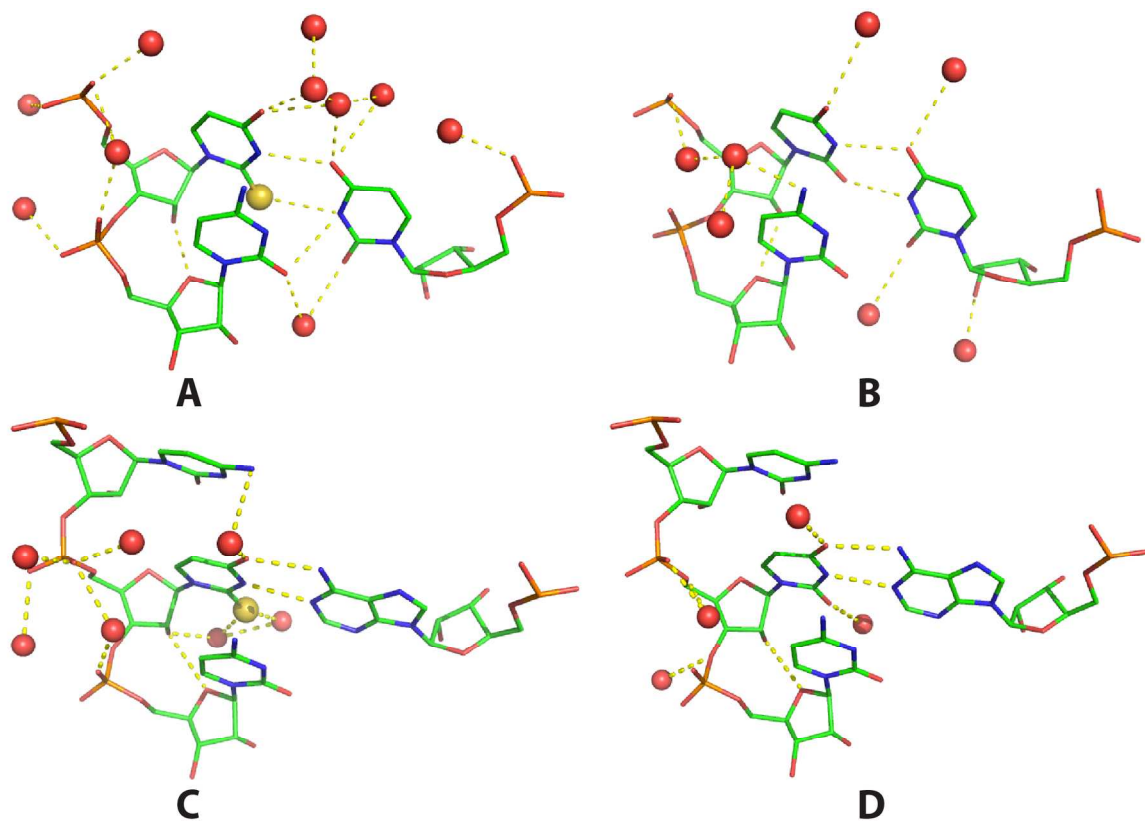

**Figure S4.** The hydration patterns discovered in (A)  $s^2$ U-U pair; (B) native U-U pair (in UU-1); (C)  $s^2$ U-A pair; (D) native U-A pair. (the yellow spheres represent the sulfur atoms)

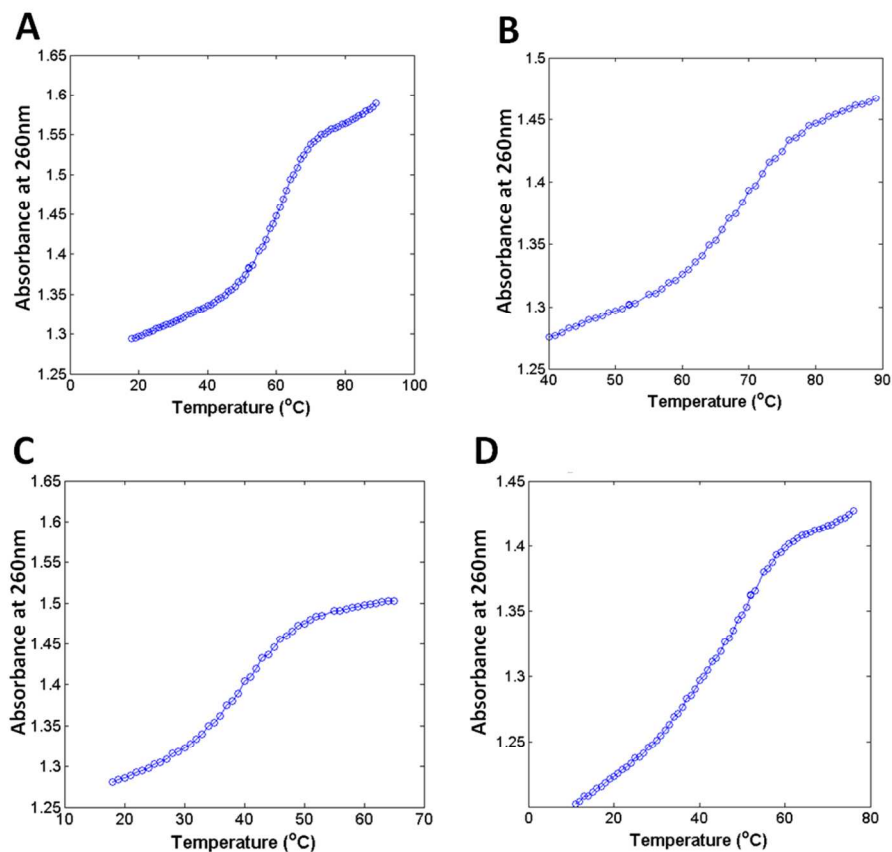

**Figure S5.** Thermal denaturation curves of (A) U-A 7mer; (B)  $s^2$ U-A 7mer; (C) U-U 7mer; and (D)  $s^2$ U-U 7mer. Samples were prepared by dilution of stock solutions into buffers containing 100 mM  $MgCl_2$  and 200 mM HEPES, pH 7.5. Total strand concentration was 200  $\mu$ M (100  $\mu$ M duplex). Absorbance was monitored at 260 nm while the temperature was ramped at  $1^\circ C \text{ min}^{-1}$  between 4 and 89  $^\circ C$ . All melt data was collected in duplicate, from the first temperature ramp-up of independent samples.
